# Supplementary material
Source: ML conference proceedings conference paper supplement (https://aclanthology.org/D17-1001)
Supplement: Attachment [file PhraseAlignment_supplementary.pdf › PhraseAlignment_supplementary.pdf]

# Supplemental Material: Monolingual Phrase Alignment on Parse Forests

Yuki Arase<sup>1\*</sup> and Junichi Tsujii<sup>\*2</sup>

<sup>1</sup>Osaka University, Japan

\*Artificial Intelligence Research Center (AIRC), AIST, Japan

<sup>2</sup>NaCTeM, School of Computer Science, University of Manchester, UK

arase@ist.osaka-u.ac.jp, j-tsuji@aiist.go.jp

## A Theorems and Proofs

This section provides a formal derivation of theorems in Sec. 3.2 and Sec. 3.3.

Since  $l/ds(\cdot)$  and  $r/ds(\cdot)$  in Definition 3.1 are sets, the same aligned pair may have more than one support of descendant alignments. Let us assume that an alignment  $\mathbb{h}_i = \langle \tau_i^s, \tau_i^t \rangle$  is supported by more than one pair of descendant alignments in  $\Delta_L$ . By the *Consistency* condition, all supports of a pair should belong to the same type (i.e., either  $\Rightarrow$  or  $\xRightarrow{R}$ ). Without a loss of generality, we can assume that all supports of a pair are  $\Rightarrow$ . That is,  $\Delta_L \supseteq (\{\langle \mathbb{h}_m, \mathbb{h}_n \rangle\} \Rightarrow \mathbb{h}_i)$ , where  $\mathbb{h}_m = \langle \tau_m^s, \tau_m^t \rangle$  and  $\mathbb{h}_n = \langle \tau_n^s, \tau_n^t \rangle$ . Since all supports of  $\mathbb{h}_i$  are  $\Rightarrow$ ,  $\tau_m^s \in l/ds(\tau_i^s) \wedge \tau_m^t \in l/ds(\tau_i^t)$  and  $\tau_n^s \in r/ds(\tau_i^s) \wedge \tau_n^t \in r/ds(\tau_i^t)$  are satisfied. Let us denote  $\mathbb{H}_m = \{\mathbb{h}_m\}$  and  $\mathbb{H}_n = \{\mathbb{h}_n\}$ . In the following, we use  $\Rightarrow$  for the two types of support ( $\Rightarrow$  and  $\xRightarrow{R}$ ).

The *Monotonous* and *Maximum Set* conditions allow  $\Delta_L$  to be further restricted so that each of aligned pairs in  $\mathbb{H}_L$  has only one support. Theorem 3.1 shows the existence of the maximum pair that satisfies:

**Lemma A.1.**  $\langle \mathbb{h}_M, \mathbb{h}_N \rangle \Rightarrow \mathbb{h}_i$  is in  $\Delta_L$ .

For each  $\mathbb{h}_m \in \mathbb{H}_m$  and  $\mathbb{h}_n \in \mathbb{H}_n$ , if all support relations from  $\Delta_L$  are removed except for the ones by the maximum pairs or the pre-terminal alignments, the resultant set  $\Delta'_L$  satisfies:

**Lemma A.2.**  $\{\mathbb{h}_p \xrightarrow{*} \mathbb{h}_q\} \in \Delta_L \leftrightarrow \{\mathbb{h}_p \xrightarrow{*} \mathbb{h}_q\} \in \Delta'_L$ .

In  $\Delta'_L$ , each aligned pair in  $\mathbb{H}_L$  has only one support. Lemma A.2 implies that  $\Delta'_L$  preserves the relationship of  $\xrightarrow{*}$  among the aligned pairs in  $\Delta_L$ . Therefore, removing the other support relations does not affect the set of aligned pairs,  $\mathbb{H}_L$ . With these lemmas, Theorem 3.2 can be derived.

Below we prove the theorems and lemmas in order of their logical relations. First, Theorem 3.1 is proved as follows.

*Proof.* Let us assume  $\exists \langle l(\tau_i^s), \tau^t \rangle \in \mathbb{H}_m$ .  $\tau_m^s \in l/ds(\tau_i^s)$  for  $\forall \langle \tau_m^s, \tau_m^t \rangle \in \mathbb{H}_m$ . Thus,  $\forall \langle \tau_m^s, \tau_m^t \rangle \in \mathbb{H}_m, \tau_m^t \in ds(\tau^t)$  (*Monotonous* condition). This means  $\mathbb{h}_M = \langle l(\tau_i^s), \tau^t \rangle$ . If  $\nexists \langle l(\tau_i^s), \cdot \rangle \in \mathbb{H}_m$ , either  $\forall \langle \tau_m^s, \tau_m^t \rangle \in \mathbb{H}_m, \tau_m^s \in l/l/ds(\tau_i^s)$  or  $\forall \langle \tau_m^s, \tau_m^t \rangle \in \mathbb{H}_m, \tau_m^s \in l/r/ds(\tau_i^s)$  should be satisfied. Otherwise, there would be a pair of alignments that support  $\langle l(\tau_i^s), \cdot \rangle$ , and by the condition of the *Maximum set*, the pair should be in  $\mathbb{H}_m$ . Without a loss of generality, we can assume  $\forall \langle \tau_m^s, \tau_m^t \rangle \in \mathbb{H}_m, \tau_m^s \in l/l/ds(\tau_i^s)$ . Then we can repeat the above argument; if  $\exists \langle l/l(\tau_i^s), \tau^t \rangle \in \mathbb{H}_m, \mathbb{h}_M = \langle l/l(\tau_i^s), \tau^t \rangle$ . Otherwise, either  $\forall \langle \tau_m^s, \tau_m^t \rangle \in \mathbb{H}_m, \tau_m^s \in l/l/l/ds(\tau_i^s)$  or  $\forall \langle \tau_m^s, \tau_m^t \rangle \in \mathbb{H}_m, \tau_m^s \in l/l/r/ds(\tau_i^s)$ . Since the process will trace a tree downward, it terminates at the pre-terminals.  $\square$

Lemma A.1 is obvious. In Lemma A.2, the sufficient condition is due to the definition. The necessary condition can be proved as follows.

*Proof.*  $\{\mathbb{h}_p \xrightarrow{*} \mathbb{h}_q\} \in \Delta_L$  can be expanded as  $(\langle \mathbb{h}_p, \cdot \rangle \Rightarrow \mathbb{h}_{p+1}), \dots, (\langle \mathbb{h}_j, \mathbb{h}_k \rangle \Rightarrow \mathbb{h}_l), \dots, (\langle \mathbb{h}_{q-1}, \cdot \rangle \Rightarrow \mathbb{h}_q)$ . For each  $\langle \mathbb{h}_j, \mathbb{h}_k \rangle \Rightarrow \mathbb{h}_l$ , there exist the maximum pairs  $\langle \mathbb{h}_J, \mathbb{h}_K \rangle \Rightarrow \mathbb{h}_l \in \Delta_L$  where  $\mathbb{h}_j \leq \mathbb{h}_J$  and  $\mathbb{h}_k \leq \mathbb{h}_K$  (Lemma A.1).  $\Delta'_L$  contains all maximum pairs, thus  $\langle \mathbb{h}_J, \mathbb{h}_K \rangle \Rightarrow \mathbb{h}_l \in \Delta'_L$ . Since  $\mathbb{h}_j \xrightarrow{*} \mathbb{h}_J$  and  $\mathbb{h}_k \xrightarrow{*} \mathbb{h}_K$  (*Same-Tree* condition), the chain relationship is retained in  $\Delta'_L$ .  $\square$

Theorem 3.2 is obvious from the definition of  $\Delta'_L$  and Lemma A.2.

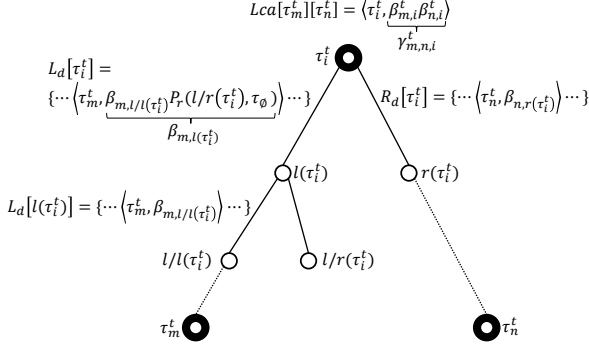

Figure 1: Bottom-up computation of  $Lca[\tau_m][\tau_n]$

## B Pseudo-code of Phrase Alignment

Algorithm B.1 depicts the pseudo-code of our alignment algorithm, which uses pre-computed  $L_d^t[\cdot]$ ,  $R_d^t[\cdot]$ , and  $Lca^t[\cdot][\cdot]$  for the target-side tree. On the other hand,  $L_d^s[\cdot]$ ,  $R_d^s[\cdot]$ , and  $Lca^s[\cdot][\cdot]$  for the source-side tree are computed on the fly for efficiency.

$Lca^t[\tau_m^t][\tau_n^t]$  stores a tuple  $\langle \tau_i^t, \gamma_{m,n,i}^t \rangle$  where  $\tau_i^t = lca(\tau_m^t, \tau_n^t)$ <sup>1</sup>.  $L_d^t[\tau_i^t]$  maintains a set of tuples of  $\langle \tau_m^t, \beta_{m,i}^t \rangle$ , which means that  $\tau_m^t$  is the left-descendant of  $\tau_i^t$  and that the path from  $\tau_m^t$  to  $\tau_i^t$  via  $l(\tau_i^t)$  has  $\beta_{m,i}^t$  as the probability.  $R_d^t[\tau_i^t]$  stores the same information for the right-descendants. When  $\tau_m^t$  and  $\tau_n^t$  are a left and right descendant of  $\tau_i^t$ , respectively,  $\tau_i^t$  is the LCA of  $\tau_m^t$  and  $\tau_n^t$  with  $\gamma_{m,n,i}^t = \beta_{m,i}^t \beta_{n,i}^t$ .  $L_d^t[\tau_i^t]$  and  $R_d^t[\tau_i^t]$  can be computed easily from those of the child phrases, i.e.,  $l(\tau_i^t)$  and  $r(\tau_i^t)$ , by tracing a tree in a bottom-up manner (Fig. 1).

Using these, Algorithm B.1 computes an array  $A[\cdot]$  as well as  $L_d^s[\cdot]$ ,  $R_d^s[\cdot]$ , and  $Lca^s[\cdot][\cdot]$  for phrases in the source-side parse tree by tracing a tree in a bottom-up manner. It should be noted that only paths from descendant phrases already aligned are computed in line 14 to 20. Paths from non-aligned phrases do not contribute to the creation of new aligned pairs.

When  $\tau_m^s$  and  $\tau_n^s$  in  $\mathbb{h}_m$  and  $\mathbb{h}_n$  are the left and right descendants of  $\tau_i^s$  (i.e.,  $\langle \tau_m^s, \cdot \rangle$  and  $\langle \tau_n^s, \cdot \rangle$  in  $L_d^s[\tau_i^s]$  and  $R_d^s[\tau_i^s]$ , respectively),  $\tau_i^s$  is the LCA of  $\tau_m^s$  and  $\tau_n^s$  to be aligned with the LCA of  $\tau_m^t$  and  $\tau_n^t$ . By retrieving  $\tau_m^t$  and  $\tau_n^t$  from  $A[\tau_m^s]$  and  $A[\tau_n^s]$ , respectively, and their LCA (i.e.,  $\tau_i^t$ ) from  $Lca^t[\tau_m^t][\tau_n^t]$ , Algorithm B.1 creates  $\mathbb{h}_i$ , which is

<sup>1</sup>In the case of forests, we store the set of tuples because the same pair of phrases may have more than one LCA and the same LCA can be reached via more than one paths.

### Algorithm B.1 Pseudo-Code of Phrase Alignment

```

1: set  $A[\tau^s] \leftarrow \emptyset$  for all  $\tau^s$ 
2: for all  $\langle w^s, w^t \rangle \in \mathbb{W}$  do
3:   Find  $\tau^s$  and  $\tau^t$  covering  $w^s$  and  $w^t$ 
4:    $\alpha = P_r(\tau^s, \tau^t)$ 
5:    $\text{PACK}(\langle \tau^s, \tau^t \rangle, \langle \alpha, \emptyset \rangle, A)$ 
6: for all  $\tau_i^s$  do  $\triangleright$  Trace source tree from the
   bottom to the top
7:   if  $\tau_i^s$  is a pre-terminal phrase then
8:      $L_d^s[\tau_i^s] \leftarrow \emptyset, R_d^s[\tau_i^s] \leftarrow \emptyset$ 
9:   else
10:    if  $A[l(\tau_i^s)] \neq \emptyset$  then
11:       $L_d^s[\tau_i^s] \leftarrow \langle l(\tau_i^s), 1 \rangle$ 
12:    else
13:       $L_d^s[\tau_i^s] \leftarrow \emptyset$ 
14:    for all  $\langle \tau_j^s, \beta_{j,l(\tau_i^s)}^s \rangle \in L_d^s[l(\tau_i^s)]$  do
15:       $L_d^s[\tau_i^s] \leftarrow L_d^s[\tau_i^s] \cup$ 
16:         $\langle \tau_j^s, \beta_{j,l(\tau_i^s)}^s P_r(l/r(\tau_i^s), \tau_\emptyset) \rangle$ 
17:    for all  $\langle \tau_j^s, \beta_{j,r(\tau_i^s)}^s \rangle \in R_d^s[r(\tau_i^s)]$  do
18:       $L_d^s[\tau_i^s] \leftarrow L_d^s[\tau_i^s] \cup$ 
19:         $\langle \tau_j^s, \beta_{j,r(\tau_i^s)}^s P_r(l/l(\tau_i^s), \tau_\emptyset) \rangle$ 
20:    *Do equivalent process for  $L_d^s[r(\tau_i^s)]$  and
       $R_d^s[l(\tau_i^s)]$  to compute  $R_d^s[\tau_i^s]$ 
21:    for all  $\langle \tau_m^s, \beta_{m,i}^s \rangle \in L_d^s[\tau_i^s]$  do
22:      for all  $\langle \tau_n^s, \beta_{n,i}^s \rangle \in R_d^s[\tau_i^s]$  do
23:         $Lca^s[\tau_m^s][\tau_n^s]$ 
24:         $\leftarrow Lca^s[\tau_m^s][\tau_n^s] \cup \langle \tau_i^s, \beta_{m,i}^s \beta_{n,i}^s \rangle$ 
25:         $\text{ALIGN}(\tau_m^s, \tau_n^s, \tau_i^s, \beta_{m,i}^s \beta_{n,i}^s, A)$ 
26: function  $\text{ALIGN}(\tau_m^s, \tau_n^s, \tau_i^s, \gamma^s, A)$ 
27:   for all  $\mathbb{h}_m = \langle \tau_m^s, \tau_m^t \rangle \in A[\tau_m^s]$  do
28:     for all  $\mathbb{h}_n = \langle \tau_n^s, \tau_n^t \rangle \in A[\tau_n^s]$  do
29:        $\langle \tau_i^t, \gamma^t \rangle \leftarrow Lca^t[\tau_m^t][\tau_n^t]$ 
30:        $\alpha = \max_{\alpha}(\mathbb{h}_m) \max_{\alpha}(\mathbb{h}_n) \gamma^s \gamma^t P_r(\tau_i^s, \tau_i^t)$ 
31:        $\text{PACK}(\langle \tau_i^s, \tau_i^t \rangle, \langle \alpha, \langle \mathbb{h}_m, \mathbb{h}_n \rangle \rangle, A)$ 
32: function  $\text{PACK}(\langle \tau^s, \tau^t \rangle, \langle \alpha, \langle \mathbb{h}_m, \mathbb{h}_n \rangle \rangle, A)$ 
33:   if  $\langle \tau^s, \tau^t \rangle \in A[\tau^s]$  then
34:      $A[\tau^s] \leftarrow A[\tau^s] \cup \langle \alpha, \langle \mathbb{h}_m, \mathbb{h}_n \rangle \rangle$   $\triangleright$  Merge
       supports and their inside probability
35:   else
36:      $A[\tau^s] \leftarrow (\langle \tau^s, \tau^t \rangle, \langle \alpha, \langle \mathbb{h}_m, \mathbb{h}_n \rangle \rangle)$ 

```

added to  $A[\tau_i^s]$ . Since both  $A[\tau_m^s]$  and  $A[\tau_n^s]$  are sets of competing aligned pairs, more than one  $\tau_m^t$  and  $\tau_n^t$  are generally retrieved. Because different pairs of  $\tau_m^t$  and  $\tau_n^t$  have their own LCA's (i.e.,  $\tau_i^t$ ), different alignments are constructed. The inside

probability of each of these new pairs can be computed from  $\alpha_m$  of  $\mathbb{h}_m$  in  $A[\tau_m^s]$  and  $\alpha_n$  of  $\mathbb{h}_n$  in  $A[\tau_n^s]$  as well as  $\gamma_{m,n,i}^s$  in  $Lca^s[\tau_m^s][\tau_n^s]$  and  $\gamma_{m,n,i}^t$  in  $Lca^t[\tau_m^t][\tau_n^t]$  in Algorithm B.1, line 30. The function  $\max_{\alpha}(\cdot)$  determines  $\alpha_m$  and  $\alpha_n$  as:

$$\alpha_j \in \{\langle \alpha_j, \langle \mathbb{h}_l, \mathbb{h}_r \rangle \rangle\}^{\alpha_j}.$$

## C Pseudo-code for Non-compositional Alignment

Algorithm C.1 is the pseudo-code of the non-compositional alignment. The following notations are used:  $[\tau_m]^i$  and  $[\tau_n]^j$  represent the phrases of  $\tau_m$  and  $\tau_n$  with the  $i$ -th and  $j$ -th sets of supporting alignments, respectively.  $\Psi^{[\tau_m]^i} = \{\psi_k^{[\tau_m]^i}\}$ ,  $\Psi^{[\tau_n]^j} = \{\psi_k^{[\tau_n]^j}\}$  are the sets of aligned phrases in  $[\tau_m]^i$  and  $[\tau_n]^j$ , respectively.  $\Phi^{[\tau_m]^i} = \{\phi_l^{[\tau_m]^i}\}$ ,  $\Phi^{[\tau_n]^j} = \{\phi_l^{[\tau_n]^j}\}$  are the sets of null-alignments in  $[\tau_m]^i$  and  $[\tau_n]^j$ , respectively.

Algorithm C.1 takes two arguments,  $\tau_m$  and  $\tau_n$ , and checks whether there are supporting alignments by which  $[\tau_m]^i$  and  $[\tau_n]^j$  are compatible. The function returns a set of tuples  $\{\langle \Psi^k, \Phi^k \rangle\}$ . If the returned set is empty,  $\tau_m$  and  $\tau_n$  are incompatible. More precisely, their alignments with the source phrases are incompatible in the sense that no pair of their supporting alignments make their null-alignments and aligned phrases compatible. They fail to create a new non-monotonic alignment pair.

In Algorithm C.1,  $Sp(\cdot)$  enumerates different supporting alignments. Let us consider that  $Sp(\psi_l^{[\tau_m]^i}) = \{[\psi_l^{[\tau_m]^i}]^k\}$ .  $\psi_l^{[\tau_m]^i}$  is one of the target phrases inside  $\tau_m$ , which is aligned with a phrase in the source by the  $i$ -th support set of alignment  $\langle \cdot, \tau_m \rangle$ . On the other hand,  $[\psi_l^{[\tau_m]^i}]^k$  denotes the same phrase, but it has its own internal structure in terms of aligned phrases and null-alignments. The internal structure is determined by the  $k$ -th support set of  $\langle \cdot, \psi_l^{[\tau_m]^i} \rangle$ . Since a tuple of  $\langle \Psi^{[\tau_n]^j}, \Phi^{[\tau_n]^j} \rangle$  determines the internal structure of  $[\tau_n]^j$ , we can treat a tuple of  $\langle \Psi, \Phi \rangle$ , where  $\Psi$  and  $\Phi$  are sets of aligned phrases and null-alignments in  $\tau_n$ , in the same way as  $[\tau_n]^j$ . The functions of DOWN and COMPATIBILITY in Algorithm C.1 use this property.

In Algorithm C.1, line 29, the MERGE function merges two sets of tuples.  $TRACE(\tau_n, \psi)$  returns a set of tuples  $\{\langle \Psi^l, \Phi^l \rangle\}$ , where all phrases in  $\Psi^l$  and  $\Phi^l$  are descendants of  $\psi$ . We can create a new

## Algorithm C.1 Pseudo-code of non-compositional alignment

---

```

1: function TRACE( $\tau_n, \tau_m$ )  $\triangleright \tau_n \in ds(\tau_m)$ 
2:    $V \leftarrow \emptyset$ 
3:   if  $\tau_m$  is a pre-terminal phrase then
4:     return  $\emptyset$ ;
5:   for all  $[\tau_m]^i \in Sp(\tau_m)$  do
6:     if  $\tau_n \in ds(\phi)$  for  $\exists \phi \in \Phi^{[\tau_m]^i}$  then
7:        $V \leftarrow V \cup \langle \Psi^{[\tau_m]^i} \cup \tau_n, (\Phi^{[\tau_m]^i} \setminus \phi) \cup$ 
        GAP( $\tau_n, \phi$ )  $\rangle$ 
8:     else if  $\tau_n \in ds(\psi)$  for  $\exists \psi \in \Psi^{[\tau_m]^i}$  then
9:        $V \leftarrow V \cup TRACE(\tau_n, \psi)$ 
10:    else
11:      for all  $[\tau_m]^j$  do
12:         $V \leftarrow V \cup DOWN([\tau_n]^j, [\tau_m]^i)$ 
13:    return  $V$ ;

14: function DOWN( $[\tau_n]^j, [\tau_m]^i$ )
15:    $V \leftarrow [\tau_m]^i$ 
16:   for all  $\psi_l \in \Psi^{[\tau_n]^j}$  do
17:      $V \leftarrow COMPATIBILITY(\psi_l, V)$ 
18:     if  $V$  is empty then
19:       return  $\emptyset$ 
20:   return  $V$ ;

21: function COMPATIBILITY( $\tau_n, C$ )
22:    $V \leftarrow \emptyset$ 
23:   for all  $\langle \Psi^k, \Phi^k \rangle \in C$  do
24:     if  $\tau_n \in ds(\phi)$  for  $\exists \phi \in \Phi^k$  then
25:        $V \leftarrow V \cup \langle \Psi^k \cup \tau_n, (\Phi^k \setminus \phi) \cup$ 
        GAP( $\tau_n, \phi$ )  $\rangle$ 
26:     else if  $\tau_n \in ds(\psi)$  for  $\exists \psi \in \Psi^k$  then
27:        $V' \leftarrow TRACE(\tau_n, \psi)$ 
28:       if  $V' \neq \emptyset$  then
29:          $V \leftarrow V \cup MERGE(\langle \Psi^k, \Phi^k \rangle, V')$ 
30:     else
31:       for all  $[\tau_n]^j$  do
32:          $V \leftarrow V \cup DOWN([\tau_n]^j, \langle \Psi^k, \Phi^k \rangle)$ 
33:   return  $V$ 

```

---

set of tuples by merging  $\langle \Psi^k, \Phi^k \rangle$  with them, that is,  $\{\langle \Psi^l \cup (\Psi^k \setminus \{\psi\}), \Phi^l \cup \Phi^k \rangle\}$ .

When  $TRACE(\tau_m^t, \tau_n^t)$  in Algorithm C.1 returns a set of  $\{\langle \Psi^k, \Phi^k \rangle\}$ , all  $\psi_l \in \Psi^k$  are aligned with phrases in the source and their inside probabilities are stored in  $A$ . We can compute the inside probability for each  $\langle \Psi^k, \Phi^k \rangle$ . A new alignment pair  $\langle \tau_i^s, \tau_i^t (= \tau_m^t) \rangle$  where  $\tau_i^s = lca(\tau_m^s, \tau_n^s)$  and their supports  $\{\langle \Psi^k, \Phi^k \rangle\}$  with their inside probabilities is stored in  $A$ .

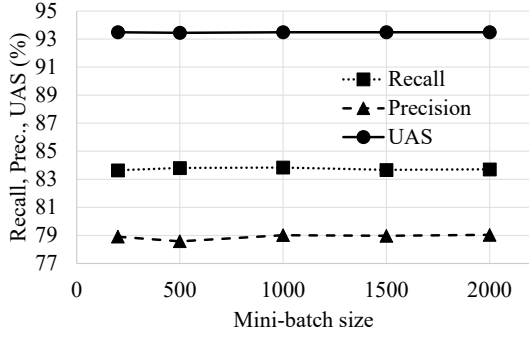

Figure 2: Effect of mini-batch size on EM training

## D Evaluation Details

### D.1 Detailed Statistics on Results

Table 1 shows results on the development and test sets with p-values in significance testing. The significance test is conducted by comparing each method to the proposed method.

### D.2 Effect of Forest Size

We investigated the effect of the size of parse forests. To obtain forests of a larger size, the parameters in Enju (Ninomiya et al., 2005) are changed, increasing the average number of nodes in a forest of the entire training corpus from 339 to 520. The hyper-parameters are set to the ones with the best performance in the development set as shown in Table 1:  $\mu_n = 1.0$ ,  $\mu_c = 3.0$ ,  $\mu_p = 0.7$ ,  $\mu_b = 150$ ,  $\mu_g = 5$  ( $\mu_b = 50$  during EM training). EM is conducted with the entire training corpus with a mini-batch size of 500 due to memory consumption using larger forests.

Consequently, the recall and precision of the alignment quality are 84.06% and 79.25%, while UAS is 93.34%, where a significant difference is not observed compared to the model trained on the previous set of (smaller) forests using the same mini-batch size of 500 (p-values are 0.07, 0.27, and 1.00 for recall, precision, and UAS, respectively). Larger forests show more potential to improve the recall of the alignment quality, a larger  $\mu_b$  may be necessary to effectively make use of such large forests where more alignment candidates are observed.

### D.3 Effect of Mini-Batch Size

We also investigated the effect of the mini-batch size in EM training using the entire training corpus (41K pairs). The hyper-parameters were set to  $\mu_n = 1.0$ ,  $\mu_c = 3.0$ ,  $\mu_p = 0.7$ ,  $\mu_b = 150$ ,  $\mu_g = 5$

(again,  $\mu_b = 50$  during EM training).

Fig. 2 shows the recall, precision, and UAS as functions of the mini-batch size. They are fairly stable against not only the mini-batch size but also the amount of training corpus (recall that the model using mini-batch size of 200 is trained on 2K samples). This demonstrates that our method can be trained with a moderate amount of data.

### D.4 Example Alignments

Table 2 and Table 3 show the phrase alignment results by our method, where near-duplicate alignments due to the hierarchy in phrase structures (e.g., alignments of parent and child phrases with only a single token difference) are omitted for clarity. Table 2 uses a simpler example where monotonic phrase alignment works, while the one in Table 3 requires non-compositional alignment to align divergent structures in source and target.

## References

Takashi Ninomiya, Yoshimasa Tsuruoka, Yusuke Miyao, and Jun’ichi Tsujii. 2005. [Efficacy of beam thresholding, unification filtering and hybrid parsing in probabilistic HPSG parsing](#). In *Proceedings of the International Workshop on Parsing Technology (IWPT)*, pages 103–114, Vancouver, British Columbia.

| Method      | UAS (Dev) | Recall                | Prec.                 | UAS (Test)            |
|-------------|-----------|-----------------------|-----------------------|-----------------------|
| Human       | –         | 90.65                 | 88.21                 | –                     |
| Proposed    | 92.79     | <b>83.64</b>          | <b>78.91</b>          | 93.49                 |
| Monotonic   | 93.04     | 82.86* ( $p = 0.01$ ) | 77.97* ( $p = 0.03$ ) | 93.49                 |
| w/o EM      | 93.17     | 81.33* ( $p = 0.02$ ) | 75.09* ( $p = 0.01$ ) | 92.91* ( $p = 0.00$ ) |
| 1-best tree | –         | 80.11* ( $p = 0.00$ ) | 73.26* ( $p = 0.00$ ) | 93.56 ( $p = 1.00$ )  |

Table 1: Evaluation results on development and test sets with p-values in significance testing

| Source                                                                                                                         | Target                                                                                                               |
|--------------------------------------------------------------------------------------------------------------------------------|----------------------------------------------------------------------------------------------------------------------|
| The four female doctors in the team have become the first Chinese women aid workers to carry out a mission outside the country | The four female doctors in the team have become China ’s first female rescue workers to carry out a mission overseas |
| The four female doctors in the team have become the first Chinese women aid workers to carry out a mission outside the country | The four female doctors in the team have become China ’s first female rescue workers to carry out a mission overseas |
| become the first Chinese women aid workers                                                                                     | become China ’s first female rescue workers                                                                          |
| the first Chinese women aid workers                                                                                            | China ’s first female rescue workers                                                                                 |
| women aid workers                                                                                                              | female rescue workers                                                                                                |
| to carry out a mission outside the country                                                                                     | to carry out a mission overseas                                                                                      |
| a mission outside the country                                                                                                  | a mission overseas                                                                                                   |
| outside the country                                                                                                            | overseas                                                                                                             |

Table 2: Example of monotonic phrase alignments

| Source                                                                                             | Target                                                                                                                         |
|----------------------------------------------------------------------------------------------------|--------------------------------------------------------------------------------------------------------------------------------|
| The 26-year AkshayVishal of Secunderabad was shot two days ago in Arkansas by unidentified persons | An unidentified assailant shot 26-year-old Akshay Vishal of Secunderabad two days ago in the state of Arkansas                 |
| The 26-year AkshayVishal of Secunderabad was shot two days ago in Arkansas by unidentified persons | 26-year-old Akshay Vishal of Secunderabad shot 26-year-old Akshay Vishal of Secunderabad two days ago in the state of Arkansas |
| shot two days ago                                                                                  | shot 26-year-old Akshay Vishal of Secunderabad two days ago                                                                    |
| in Arkansas by unidentified persons                                                                | in the state of Arkansas                                                                                                       |

Table 3: Example of phrase alignments with non-compositional alignment
